# Supplementary material
Source: PubMed Central journal article supplement (PMC3393830)

**Figure 3.**  
**Mean Accuracy Scores in the 10 sec Delay Period**  
**as a Function of Perceptual Encoding at 200 ms:**  
**Good vs Poor Encoders**

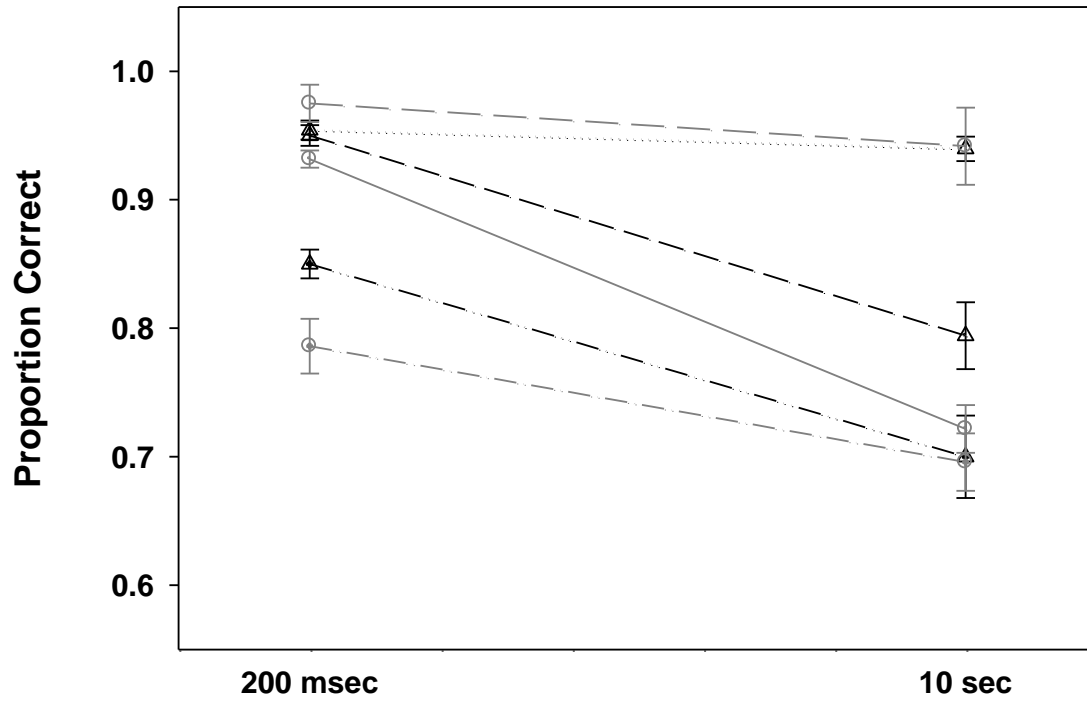

Supplement: NIHMS378441-supplement-03.pdf [file NIHMS378441-supplement-03.pdf]
