# Supplementary material
Source: PubMed Central journal article supplement (PMC3393830)

**Figure 1.**  
**Mean Accuracy Scores for Schizophrenia**  
**Patients and NC for Each Delay Period**

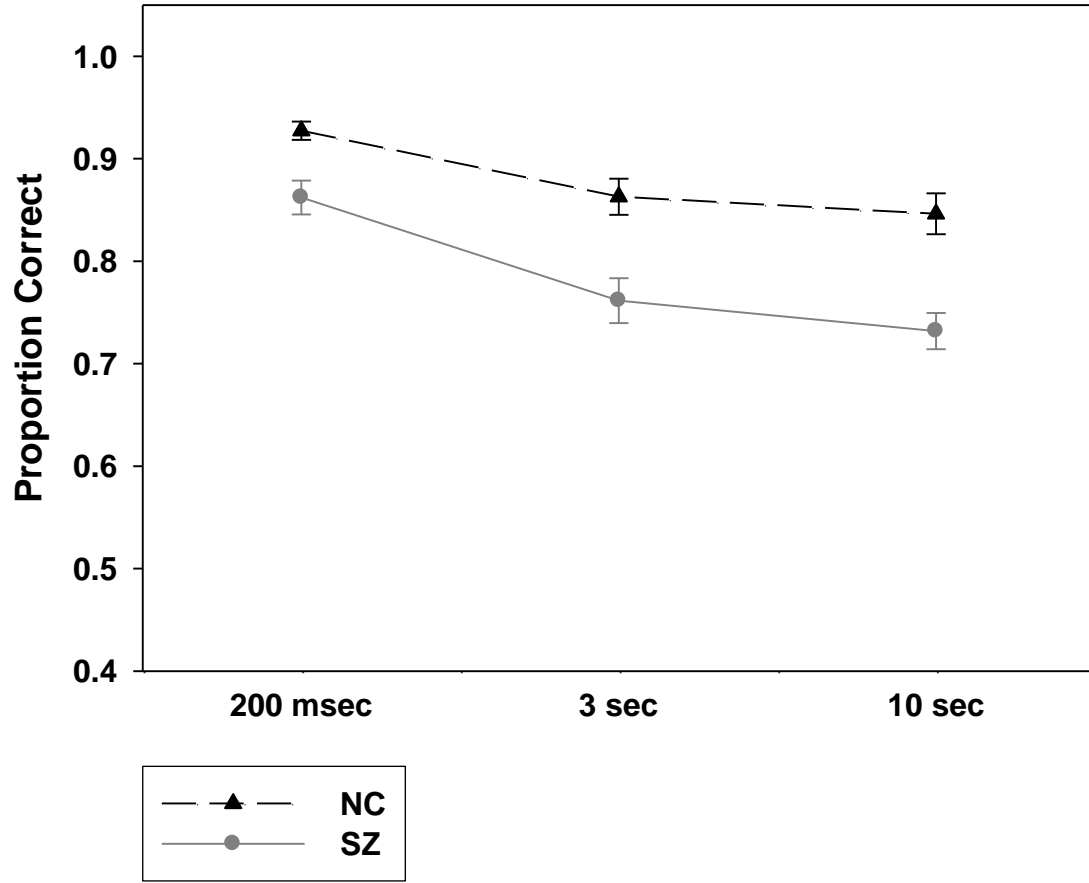

Supplement: NIHMS378441-supplement-01.pdf [file NIHMS378441-supplement-01.pdf]
